# Supplementary material
Source: PubMed Central journal article supplement (PMC2982754)

## **Supplemental Information:**

### **Supplemental Materials and Methods:**

#### ***In vitro* cross-linking of CtsR**

CtsR was incubated at different temperatures with or without an excess of *clpC* promoter fragment and cross-linked by the addition of 2mM EDC and 5mM NHS for 20 min. (Bartegi et al, 1990). After addition of SDS sample buffer a 1D-SDS PAGE and a Western Blot with CtsR antibody were performed.

#### **Error-prone PCR**

An artificially constructed *clpC* operon with a *spec<sup>R</sup>*-cassette (shown in Fig. 1a) was amplified from a plasmid using a standard error-prone PCR protocol (Eckert & Kunkel, 1991). The resulting DNA fragments were transformed into *B. subtilis* 168 carrying a *clpE*-*bgaB* reporter construct at the *amyE* locus. This method allowed us to screen for inactive CtsR variants under 37°C on X-Gal containing LB plates. Blue colonies were isolated and their *ctsR* genes were sequenced.

### **Supplemental Figures:**

#### **Figure S1 Composition of the *clpC* operon in different phyla of Gram+ bacteria**

Presence or absence of the two modulators of CtsR activity in the *clpC* operon among different Gram+ bacteria. McsB, which was identified in *B. subtilis* as crucial for the regulation of CtsR activity, is absent in some Gram+ phyla, which raises doubts about the current model. We conclude that CtsR activity is more likely regulated by a general and simpler mechanism in all Gram+ bacteria.

#### **Figure S2 Transcriptional analysis of *clpE* in a *ywlE* mutant**

Northern Blot analysis of *B. subtilis* *clpE* mRNA in the wild-type and a *ywlE* mutant strain during exponential growth (37°C) and heat stress (50°C).

### **Figure S3 CtsR is inactivated in a temperature dependent manner**

(A-B) Binding of CtsR to the *clpE* promoter fragment which contains additional CtsR binding sites. EMSA analysis performed at 37°C ( $K_d=0.83 \pm 0.009$  (A) or 50°C ( $K_d=11.34 \pm 0.09$ ) (B) and quantification of CtsR binding to the *clpE* promoter at different temperatures (C).

### **Figure S4 Cross-linking of CtsR at different temperatures**

CtsR was cross-linked with DNA (*clpC* promoter fragment) at 37°C and at 50°C to evaluate whether CtsR dimerization is influenced by the dissociation of CtsR from the DNA. The results show that the dissociation from the DNA takes place under the maintenance of the CtsR dimers.

### **Figure S5 Hot-spot mutations in CtsR**

The *B. subtilis* CtsR protein sequence is depicted with several amino acids colored in red, where error-prone mutations led to an inactive CtsR protein. The Helix-turn-Helix motive and the winged HTH region are underlined.

### **Figure S6 Impact of different CtsR point mutations on CtsR dependent transcription**

Northern Blot analysis of *B. subtilis clpE* mRNA in a CtsR<sup>V16M</sup> or CtsR<sup>G65S</sup> strain during exponential growth (37°C) and heat stress (50°C).

### **Figure S7 Modeled structure of mutant and wild-type CtsR**

A theoretical structure of the winged HTH domain was modeled with the G64P substitution (red) using SWISS-MODEL (Arnold et al, 2006) and then compared with the CtsR crystal structure (Fuhrmann et al, 2009) (green). Areas where both structures are identical appear yellow. The G65P amino acid substitution shows no influence on the overall CtsR structure, except at position 64.

### **Figure S8 CtsR<sup>G64P</sup> is not temperature dependently inactivated**

CtsR<sup>G64P</sup> is not inactivated upon heat exposure and binds DNA with an equal intensity like under control conditions.

**Figure S9 A kinase deficient McsB mutant is no longer able to bind CtsR during heat stress**

Co-immunoprecipitation of McsB or McsB<sup>C167S</sup> with CtsR during control or 10 minutes after heat stress followed by Western-Blot analysis with McsB and CtsR antibodies.

**Figure S10 Degradation of CtsR in *L. lactis***

Pulse-chase labeling and immunoprecipitation of CtsR in *L. lactis* wild-type or *clpE* mutant cells during a temperature shift to 42°C.

**Figure S11 Inactivation of CtsR during disulfide stress depends on the presence of McsB**

Northern Blot analysis of *B. subtilis clpE* mRNA in the wild-type and a *mcsB* mutant strain during exponential growth and disulfide stress (1mM diamide).

**Table S1.** Strains used in this study.

| strain/plasmid     | Genotype or description                                                                                                                                                                                              | reference/construction             |
|--------------------|----------------------------------------------------------------------------------------------------------------------------------------------------------------------------------------------------------------------|------------------------------------|
| <i>E. coli</i>     |                                                                                                                                                                                                                      |                                    |
| BL21(DE3)pLysS     | F <sup>-</sup> <i>lon hsdS<sub>B</sub></i> ( <i>r<sub>B</sub><sup>-</sup> m<sub>B</sub><sup>-</sup></i> ) with DE3, a λ prophage carrying T7 RNA polymerase gene and plasmid pLysS containing T7 phage lysozyme gene |                                    |
| <i>B. subtilis</i> |                                                                                                                                                                                                                      |                                    |
| 168                | <i>trpC2</i>                                                                                                                                                                                                         | (Anagnostopoulos & Spizizen, 1961) |
| BMM1               | <i>trpC2 amyE::cat (clpE<sup>-</sup>-bgaB)</i>                                                                                                                                                                       | (Miethke et al, 2006)              |
| BEK89              | <i>trpC2 ΔmcsB::aphA3</i>                                                                                                                                                                                            | (Krüger et al, 2001)               |
| BAE048             | <i>trpC2 ΔywlE::ahpA3</i>                                                                                                                                                                                            | this study                         |
| BAE019             | <i>trpC2 ctsR::spec<sup>R</sup></i>                                                                                                                                                                                  | this study                         |
| BAE051             | <i>trpC2 ctsR::spec<sup>R</sup> mcsB<sup>C167S</sup></i>                                                                                                                                                             | this study                         |

| strain/plasmid                                 | Genotype or description                                                             | reference/construction  |
|------------------------------------------------|-------------------------------------------------------------------------------------|-------------------------|
| BAE049                                         | <i>trpC2 ΔywlE::ahpA3 ΔclpC::tet<sup>R</sup></i>                                    | this study              |
| BAE056                                         | <i>trpC2 ctsR::spec<sup>R</sup> mcsB<sup>C167S</sup> ΔywlE::ahpA3</i>               | this study              |
| BAE064                                         | <i>trpC2 ctsR::spec<sup>R</sup> ctsR<sup>G64P</sup></i>                             | this study              |
| BAE081                                         | <i>trpC2 ΔmcsB::aphA3 ctsR::spec<sup>R</sup> ctsR<sup>G64P</sup></i>                | BAE064-->BEK89          |
| BAE070                                         | <i>trpC2 ctsR::spec<sup>R</sup> ctsR<sup>R63K</sup></i>                             | this study              |
| BAE071                                         | <i>trpC2 ctsR::spec<sup>R</sup> ctsR<sup>R63K/R70K</sup></i>                        | this study              |
| BAE072                                         | <i>trpC2 ctsR::spec<sup>R</sup> ctsR<sup>R28K/R50K/R55K/R63K/R70K</sup></i>         | this study              |
| BAE085                                         | <i>trpC2 amyE::cat (clpE`-bgaB) ΔctsR::aphA3 pDG148 ::ctsR-G.stearothermophilus</i> | this study              |
| BAE033                                         | <i>trpC2 ctsR::spec<sup>R</sup> ctsR<sup>V16M</sup></i>                             | this study              |
| BAE034                                         | <i>trpC2 ctsR::spec<sup>R</sup> ctsR<sup>G65S</sup></i>                             | this study              |
| BDZ12                                          | <i>trpC2 amyE::cat (clpE`-bgaB) ΔctsR::aphA3 pDG148 ::ctsR-L.lactis</i>             | this study              |
| <i>L. lactis</i>                               |                                                                                     |                         |
| MG1363                                         | Wild-type <i>L. lactis</i> subsp. <i>cremoris</i>                                   |                         |
| HI1931                                         | MG1363 <i>ΔclpE::tet<sup>R</sup></i>                                                | (Varmanen et al, 2003)  |
| plasmids                                       |                                                                                     |                         |
| pDG148                                         | <i>lacI/pspac/kan/ble/B. subtilis ori pUB110/E. coli ori pBR322/Amp<sup>R</sup></i> | (Stragier et al, 1988)  |
| pRSETA                                         | cloning vector, Amp <sup>R</sup>                                                    | invitrogen              |
| pRSETA-CtsR                                    | cloning vector, Amp <sup>R</sup>                                                    | (Krüger & Hecker, 1998) |
| pRSETA-CtsR- <i>L.lactis</i>                   | cloning vector, Amp <sup>R</sup>                                                    | this study              |
| pRSETA-CtsR- <i>L.lactis</i> -G65P             | cloning vector, Amp <sup>R</sup>                                                    | this study              |
| pRSETA-CtsR- <i>G.stearothermophilus</i>       | cloning vector, Amp <sup>R</sup>                                                    | this study              |
| pRSETA-CtsR- <i>G.stearothermophilus</i> -G64P | cloning vector, Amp <sup>R</sup>                                                    | this study              |
| pRSETA-CtsR-G64P                               | cloning vector, Amp <sup>R</sup>                                                    | this study              |

| strain/plasmid                           | Genotype or description                                                             | reference/construction |
|------------------------------------------|-------------------------------------------------------------------------------------|------------------------|
| pUS19- <i>clpC</i> strep                 | integration vector for <i>B. subtilis</i>                                           | this study             |
| pDG148-CtsR- <i>L.lactis</i>             | <i>lacI/pspac/kan/ble/B. subtilis ori pUB110/E. coli ori pBR322/Amp<sup>R</sup></i> | this study             |
| pDG148-CtsR-G. <i>stearothermophilus</i> | <i>lacI/pspac/kan/ble/B. subtilis ori pUB110/E. coli ori pBR322/Amp<sup>R</sup></i> | this study             |

*aphA3*, *cat*, *tet* and *spec* stand for resistance to kanamycin, chloramphenicol, tetracyclin and spectinomycin, respectively.

**Table S2.** Primer used in this study.

| purpose                       | name               | sequence (5'-3')                                   |
|-------------------------------|--------------------|----------------------------------------------------|
| <i>in vivo</i> genetic system | McsA_Bfor2_up      | GTGGGACATAATATTTCTGAC                              |
|                               | McsA_Brev_down     | TTCCTAGAAGCTGGAGCACC                               |
|                               | CtsRrev_spec_SD_up | CAAATATATCCTCCTCACTATTTATTTTAATTTAAAGAAGTCAGC      |
|                               | McsA_SD_spec_OT    | AAATAACAGATTAATAATAAGCGG<br>GTGAAAAGATTGATTTGTCAAG |
|                               | Spec_for_SD        | ATAGTGAGGAGGATATATTTG                              |
|                               | Spec_rev_OT        | TTATAATTTTTTAAATCTGTTATTT                          |
| $\Delta ywE$                  | YwIE_up_for        | GTCGGCCTTGGAATGGGCATG                              |
|                               | YwIE_down_rev      | CATTATGCACCCTCGTCGC                                |
|                               | YwIE_km_rev        | GTGATATTCTCATTTTAGCCATGTCAGTCAC<br>CCCTATTTTTTC    |
|                               | km_for             | GAAAAATAAGGGGTGACTGACATGGCTAAA<br>ATGAGAATATCAC    |
|                               | Ywle_km_for        | TACTGGATGAATTGTTTTAGGTTGTCAGAA<br>AATCTGCAAAC      |
|                               | Km_rev             | GTTTGCAGATTTTCTGACAACCTAAAACAAT<br>TCATCCAGTAA     |
| substitution mutants          | McsB_GTS_C167S_for | CAAAGAGGATACTTAACCAGCTCTCCTACA<br>AACGTA           |
|                               | McsB_GTS_C167S_rev | GCTGGTTAAGTATCCTCTTTGCTCATTGAAT<br>G               |
|                               | CtsR_G64P_GTS_for  | ATTGTTGAGAGCAAACGCGGGCCCGGCGG<br>TTACA             |
|                               | CtsR_G64P_GTS_rev  | CCCGCGTTTGCTCTCAACAATATATCCTCTT<br>TC              |

| purpose                                                  | name                    | sequence (5'-3')                                                          |
|----------------------------------------------------------|-------------------------|---------------------------------------------------------------------------|
|                                                          | MCSB_STREP_FOR          | ATGGCTAGCTGGAGCCACCCGCAGTTCGA<br>AAAAGGCGCCATGTGCTAAAGCATTTTATT<br>CAGG   |
|                                                          | MCSB_STRET_REV          | GGCGCCTTTTTCGAACTGCGGGTGGCTCC<br>AGCTAGCCATTACTCCTGTTCTCCTCACTA<br>TC     |
|                                                          | clpC-STREP-for          | CGCGGATCCCAATTGACAGAGAAAGTCAG<br>AAGAAA                                   |
|                                                          | clpC-STREP-rev          | CGGAATTCTTATTTTTCGAATTGCGGATGAG<br>ACCACGCAGAATTCGTTTTAGCAGTCGTTT<br>TTAC |
|                                                          | R63L_GTS_for            | GATATATTGTTGAGAGCAAAAAGGGGCG<br>GCGGT                                     |
|                                                          | R63L_GTS_rev            | TTTGCTCTCAACAATATATCCTCTTTGCT                                             |
|                                                          | CtsR_GTS_R70L_for       | CGGGGGCGGCGGTTACATCAAATCATTAA<br>AAT                                      |
|                                                          | Ctsr_GTS_R70rev         | GATGTAACCGCCGCCCCCGCGTTTGCTCT<br>C                                        |
|                                                          | CtsR_R28L_for           | AGGAAATTTTAGAGATTAaaaaaaAGTGAAT<br>TGCAG                                  |
|                                                          | CtsR_R28L_rev           | TTTAATCTCTAAAATTCCTTGCCATTTTG                                             |
|                                                          | CtsR_R5055L_for         | TAAATTATGTCATCAACACCAAATTTACAAG<br>CGAAAAAGGATATATTG                      |
|                                                          | CtsR_R5055L_rev         | GGTGTGATGACATAATTTATTTGGGAAGGA<br>AC                                      |
| ectopic expression of<br>different CtsR's from<br>pDG148 | pDG_CtsR_bt_sall        | ACGCGTCGACGTGCCGAACATTTCCGACA<br>T                                        |
|                                                          | pDG_CtsR_bt_sphI        | CCCGCATGCCTATTTGTATTTAGCGACGT                                             |
|                                                          | ctsr_llac_for           | GTCGACATGGCAGGTCAAAAAAATAC                                                |
|                                                          | ctsr_llac_rev           | GCATGCTCAAATTCATCGTCACGGTC                                                |
| over-expression of<br>different CtsR's from<br>pRSETA    | prsetA_CtsR_bt_Bam      | GGAGGATCCGTGCCGAACATTTCCGACAT                                             |
|                                                          | prsetA_CtsR_bt_Eco      | GAAGAATTCCTATTTGTATTTAGCGACGT                                             |
|                                                          | pRSETA_CtsR_LI_Ba<br>m  | GGAGGATCCATGGCAGGTCAAAAAAATACA<br>T                                       |
|                                                          | pRSETA_CtsR_LI_kp<br>NI | GGTGGTACCTCAAATTCATCGTCACGGTC                                             |

## References and Notes

- Anagnostopoulos C, Spizizen J (1961) REQUIREMENTS FOR TRANSFORMATION IN BACILLUS SUBTILIS. *Journal of Bacteriology* **81**(5): 741-746
- Arnold K, Bordoli L, Kopp J, Schwede T (2006) The SWISS-MODEL workspace: a web-based environment for protein structure homology modelling. *Bioinformatics* **22**(2): 195-201
- Bartegi A, Fattoum A, Kassab R (1990) Cross-linking of smooth muscle caldesmon to the NH2-terminal region of skeletal F-actin. *J Biol Chem* **265**(4): 2231-2237
- Eckert KA, Kunkel TA (1991) DNA polymerase fidelity and the polymerase chain reaction. *PCR Methods Appl* **1**(1): 17-24
- Fuhrmann J, Schmidt A, Spiess S, Lehner A, Turgay K, Mechtler K, Charpentier E, Clausen T (2009) McsB is a protein arginine kinase that phosphorylates and inhibits the heat-shock regulator CtsR. *Science* **324**(5932): 1323-1327
- Krüger E, Hecker M (1998) The first gene of the Bacillus subtilis clpC operon, ctsR, encodes a negative regulator of its own operon and other class III heat shock genes. *Journal of Bacteriology* **180**(24): 6681-6688
- Krüger E, Zühlke D, Witt E, Ludwig H, Hecker M (2001) Clp-mediated proteolysis in Gram-positive bacteria is autoregulated by the stability of a repressor. *EMBO J* **20**(4): 852-863
- Miethke M, Hecker M, Gerth U (2006) Involvement of Bacillus subtilis ClpE in CtsR degradation and protein quality control. *Journal of Bacteriology* **188**(13): 4610-4619
- Stragier P, Bonamy C, Karmazyn-Campelli C (1988) Processing of a sporulation sigma factor in Bacillus subtilis: how morphological structure could control gene expression. *Cell* **52**(5): 697-704
- Varmanen P, Vogensen FK, Hammer K, Palva A, Ingmer H (2003) ClpE from Lactococcus lactis promotes repression of CtsR-dependent gene expression. *Journal of Bacteriology* **185**(17): 5117-5124

Figure S1:

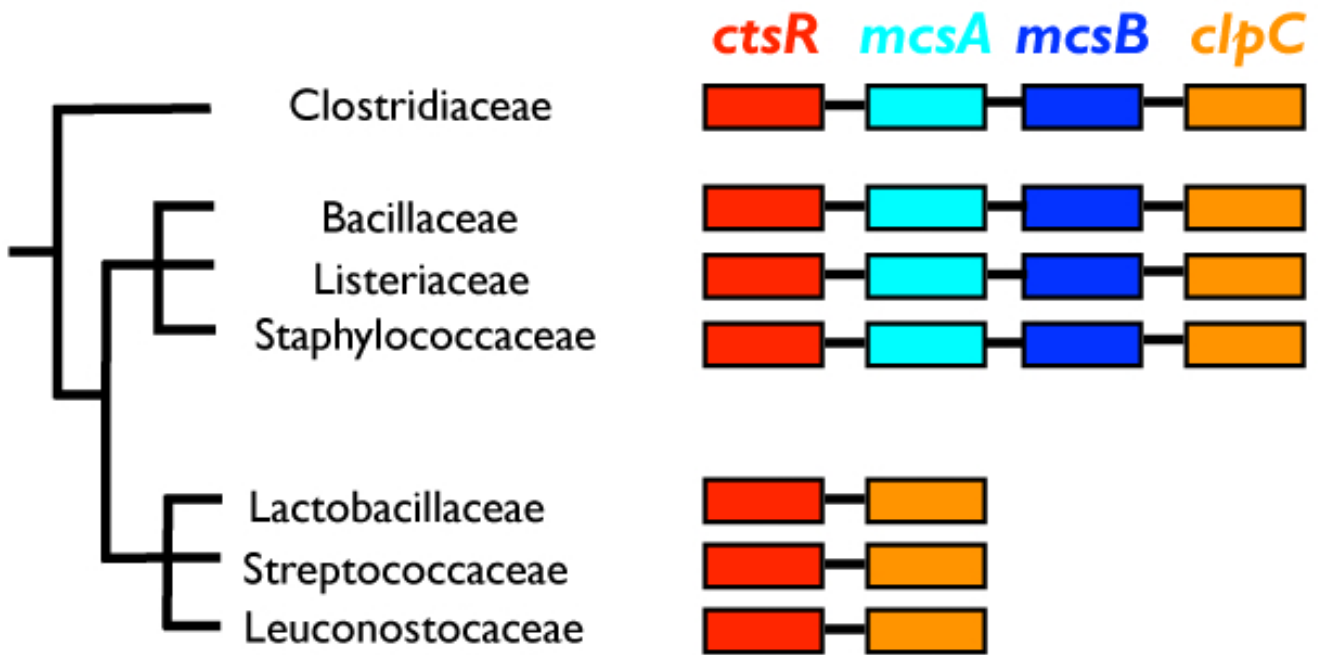



Figure S2:

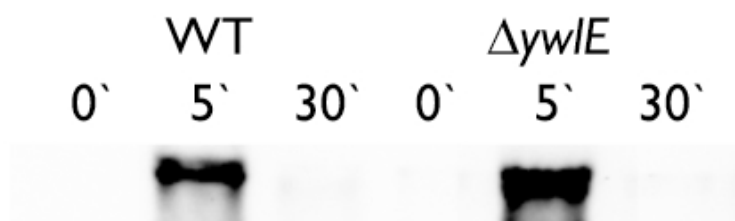

Figure S3:

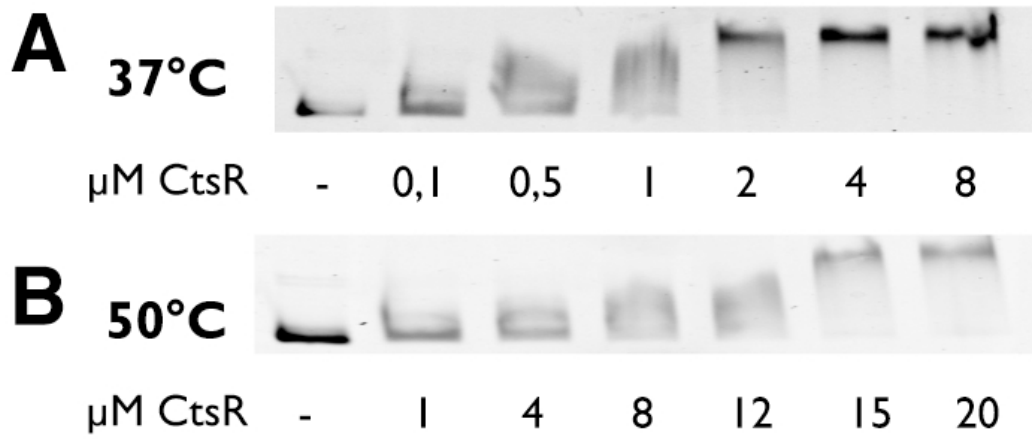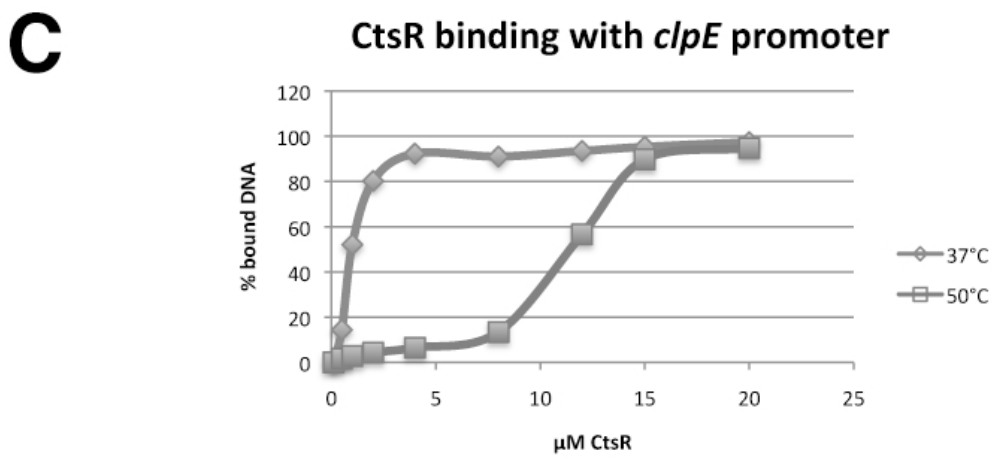

Figure S4:

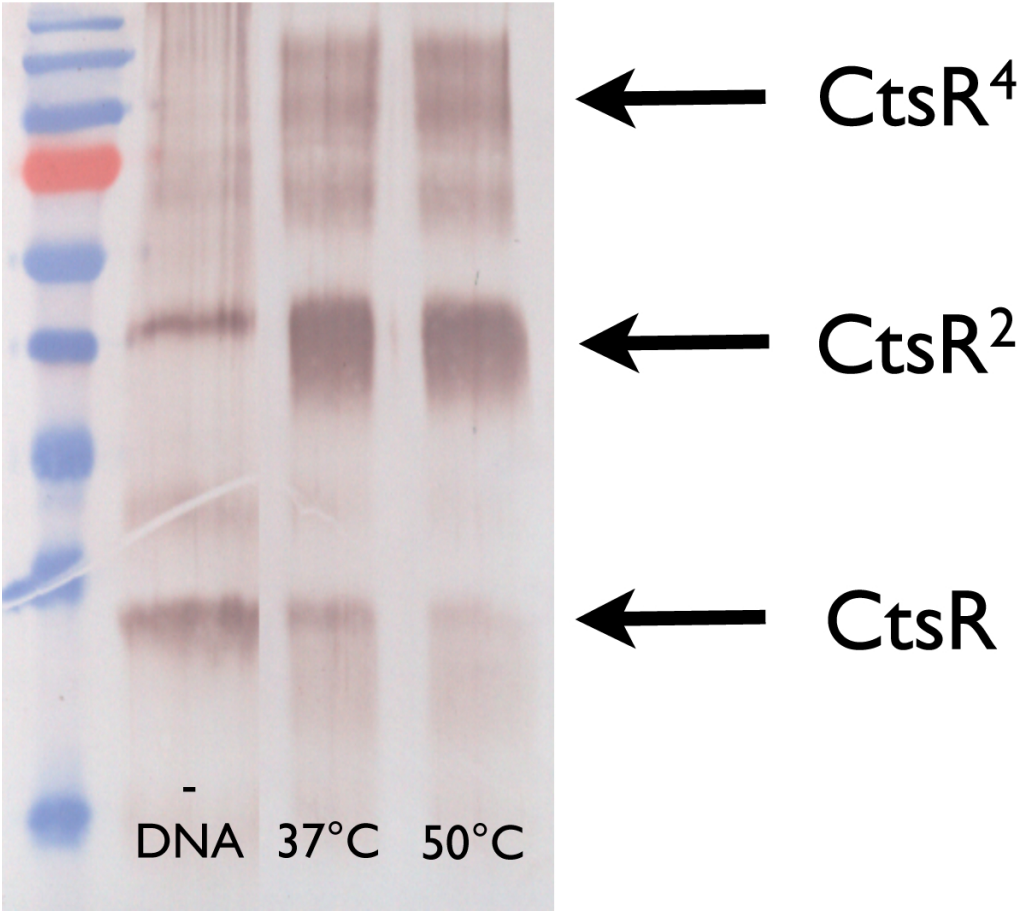

Figure S5:

1 - MGHNISDIIE QYLKRVLDQN GKEILEIKRS EIADKFQCVPSQINYVINTR FTSEARGYIVE  
 61 - SKRGGGGYIR IIKIKMNEV VLINNIISQI NTHLSQAASD DIILRLLEDK VISEREAKMM  
 121 - VSVMDRSVLH IDLPERDEL R ARMMKAMLTS LKLK

Figure S6:

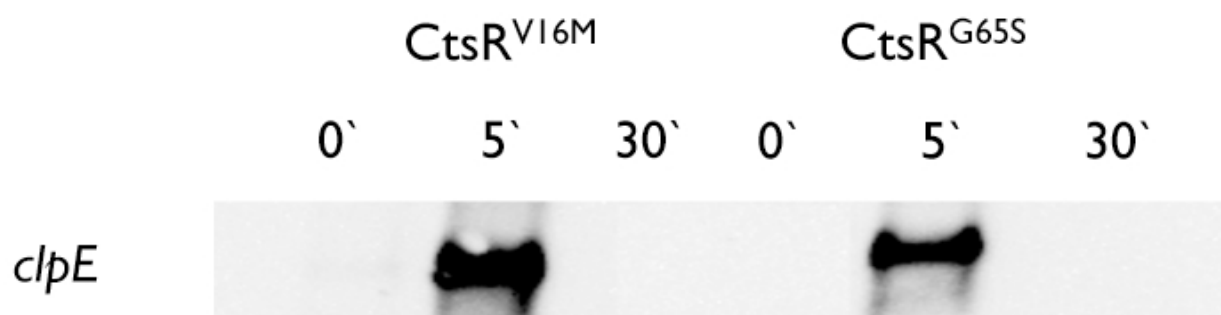

Figure S7:

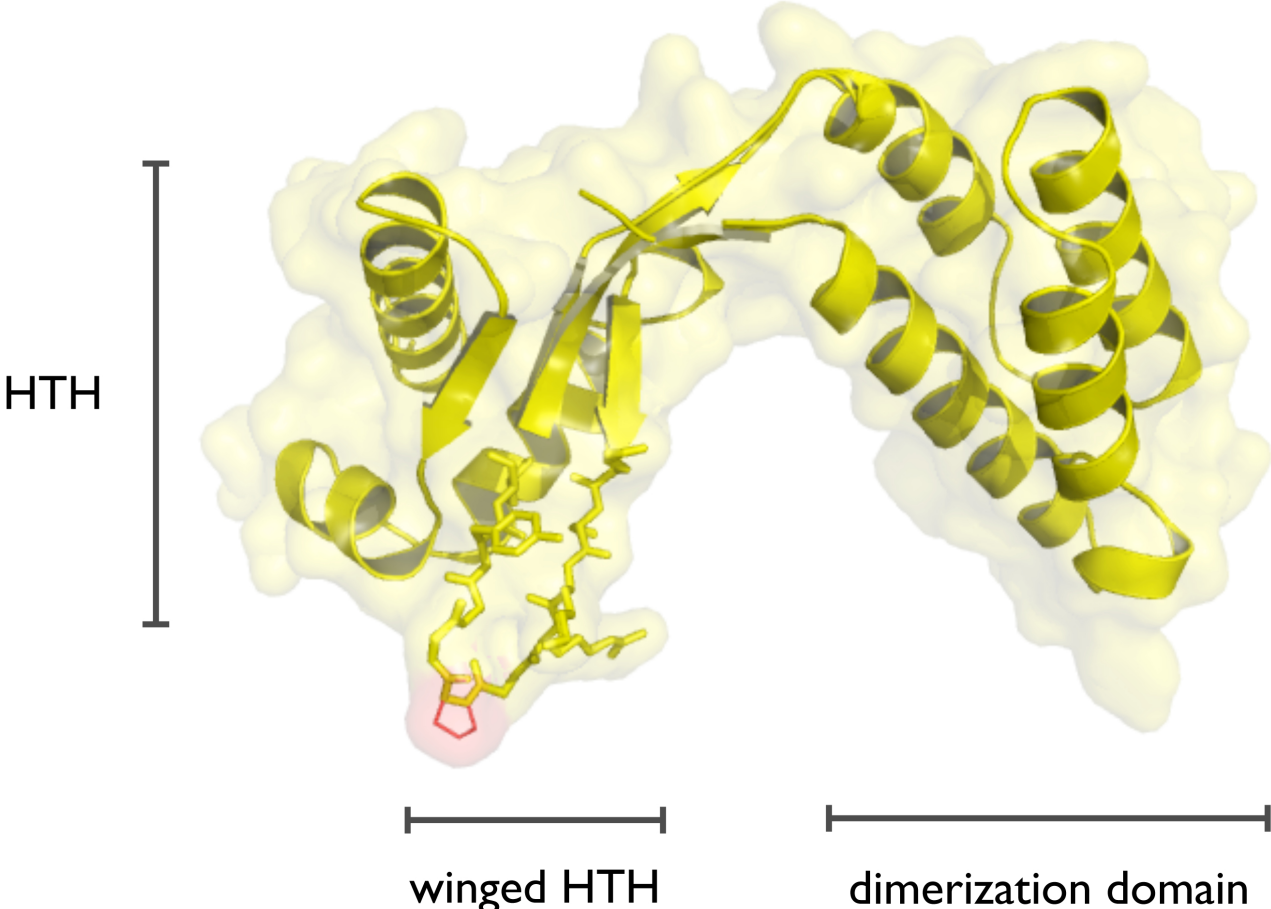

Figure S8:

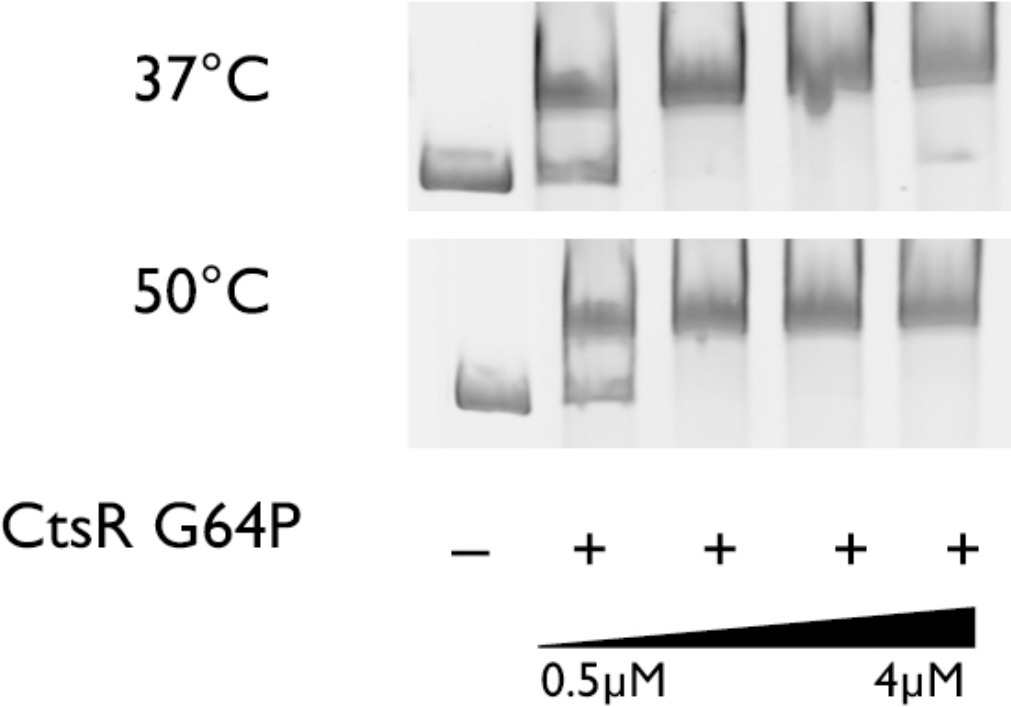

Figure S9:

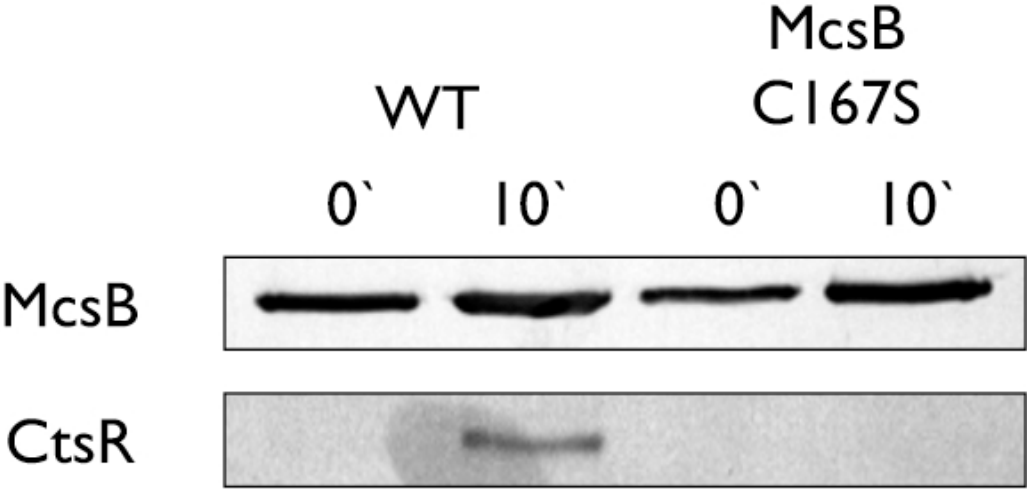



Figure S10:

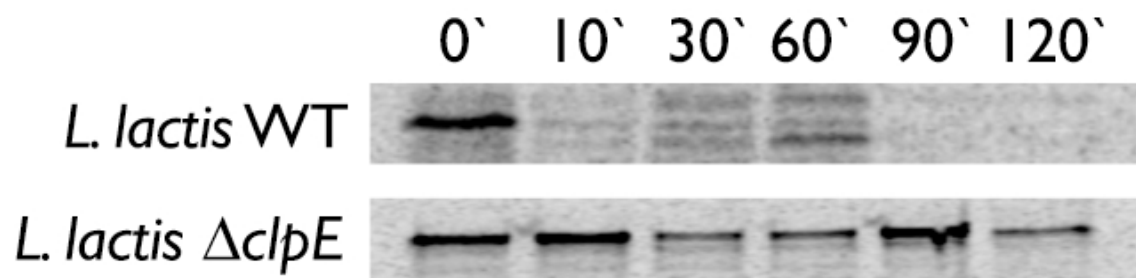

Figure S11:

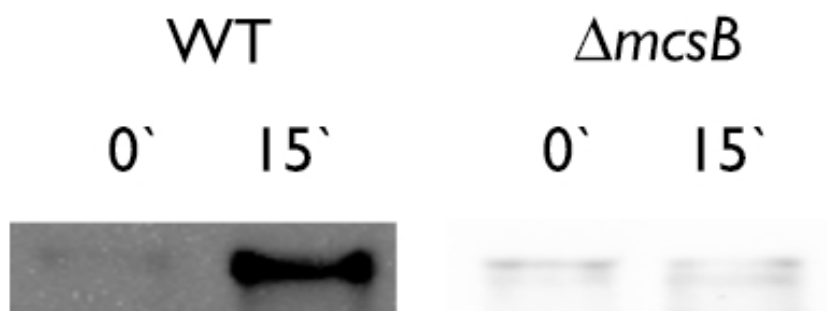

Supplement: emboj2010228s1.pdf [file emboj2010228s1.pdf]
